# Supplementary material
Source: PubMed Central journal article supplement (PMC2881531)
Supplement: supp_ERC-10-0016_100016_Figure_1.pdf [file supp_ERC-10-0016_100016_Figure_1.pdf]

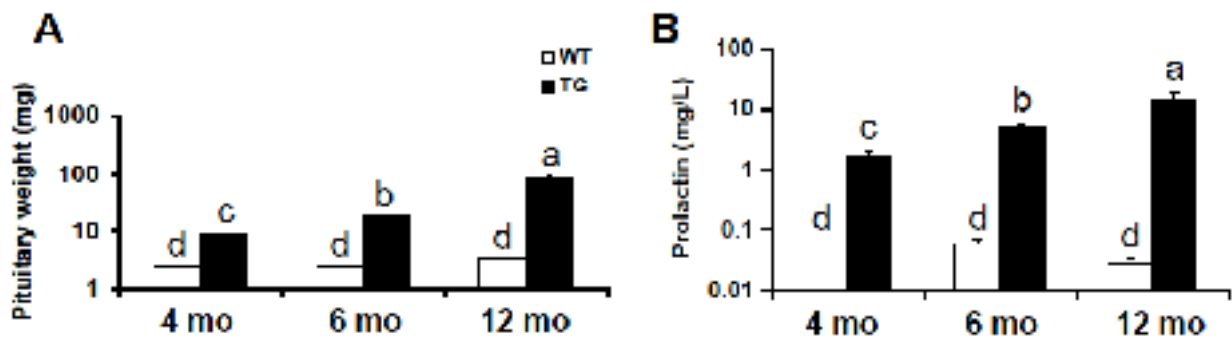

**Supplementary Figure 1** Pituitary weights (A), and serum PRL concentrations (B) of 4-, 6- and 12-month-old wild-type (WT, open bars) and transgenic (TG, solid bars) female mice. Note the logarithmic scales. Different letters above the bars indicate that these groups differ significantly ( $P$  at least  $< 0.05$ ). The data shown are mean  $\pm$  SEM, and the numbers of mice per group are 8–17 (A) and 5–16 (B).
