# Supplementary material
Source: PubMed Central journal article supplement (PMC2881531)
Supplement: supp_ERC-10-0016_100016_Figure_3.pdf [file supp_ERC-10-0016_100016_Figure_3.pdf]

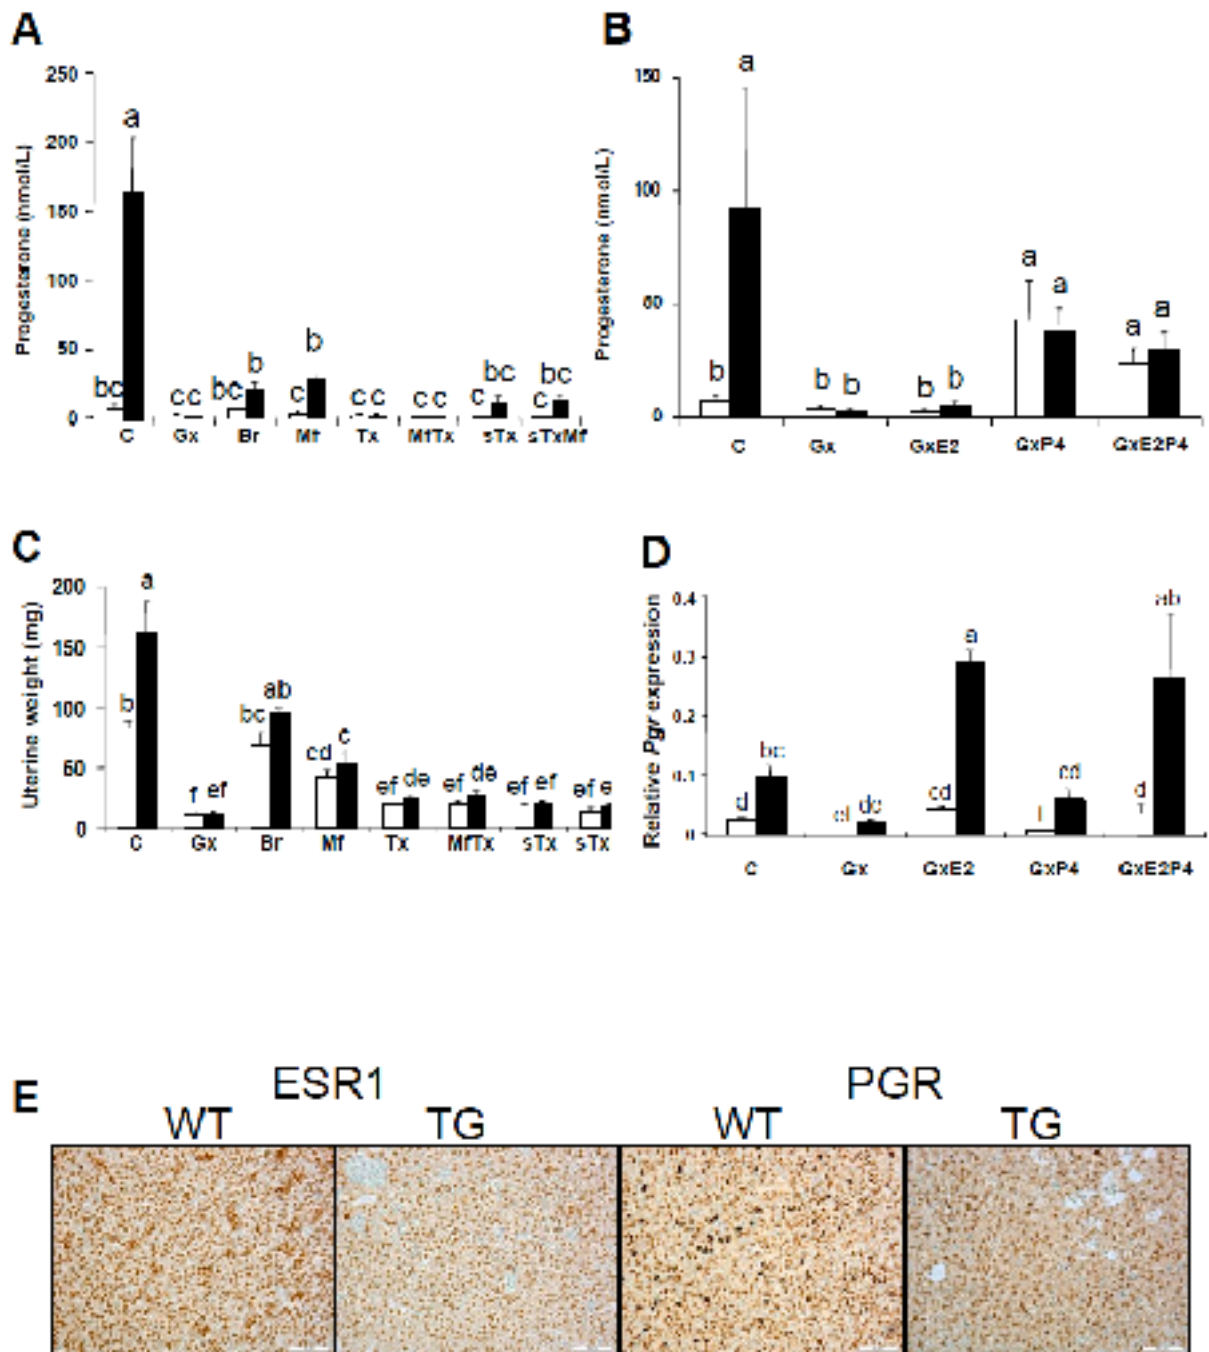

**Supplementary Figure 3** Serum P4 levels (A, B), uterine weights (C), pituitary Pgr expression (D), and immunohistochemical evaluation of ESR1 and PGR (panel E). Panels A and C show data from the hormone antagonist experiment, and panels B and D from the hormone treatment experiment (see Table 1). The open bars denote WT females and filled bars TG females (mean  $\pm$  SEM with 5–16 mice/group). The treatments are indicated below the panels (abbreviations as in Table 1 of the main text). Different letters above the bars denote significant difference between such groups ( $P < 0.05$ ). In panel E, ESR1 and PGR show intense nuclear staining both in WT and TG females (age 6 months).
