# Supplementary material
Source: PubMed Central journal article supplement (PMC2881531)
Supplement: supp_ERC-10-0016_100016_Figure_4.pdf [file supp_ERC-10-0016_100016_Figure_4.pdf]

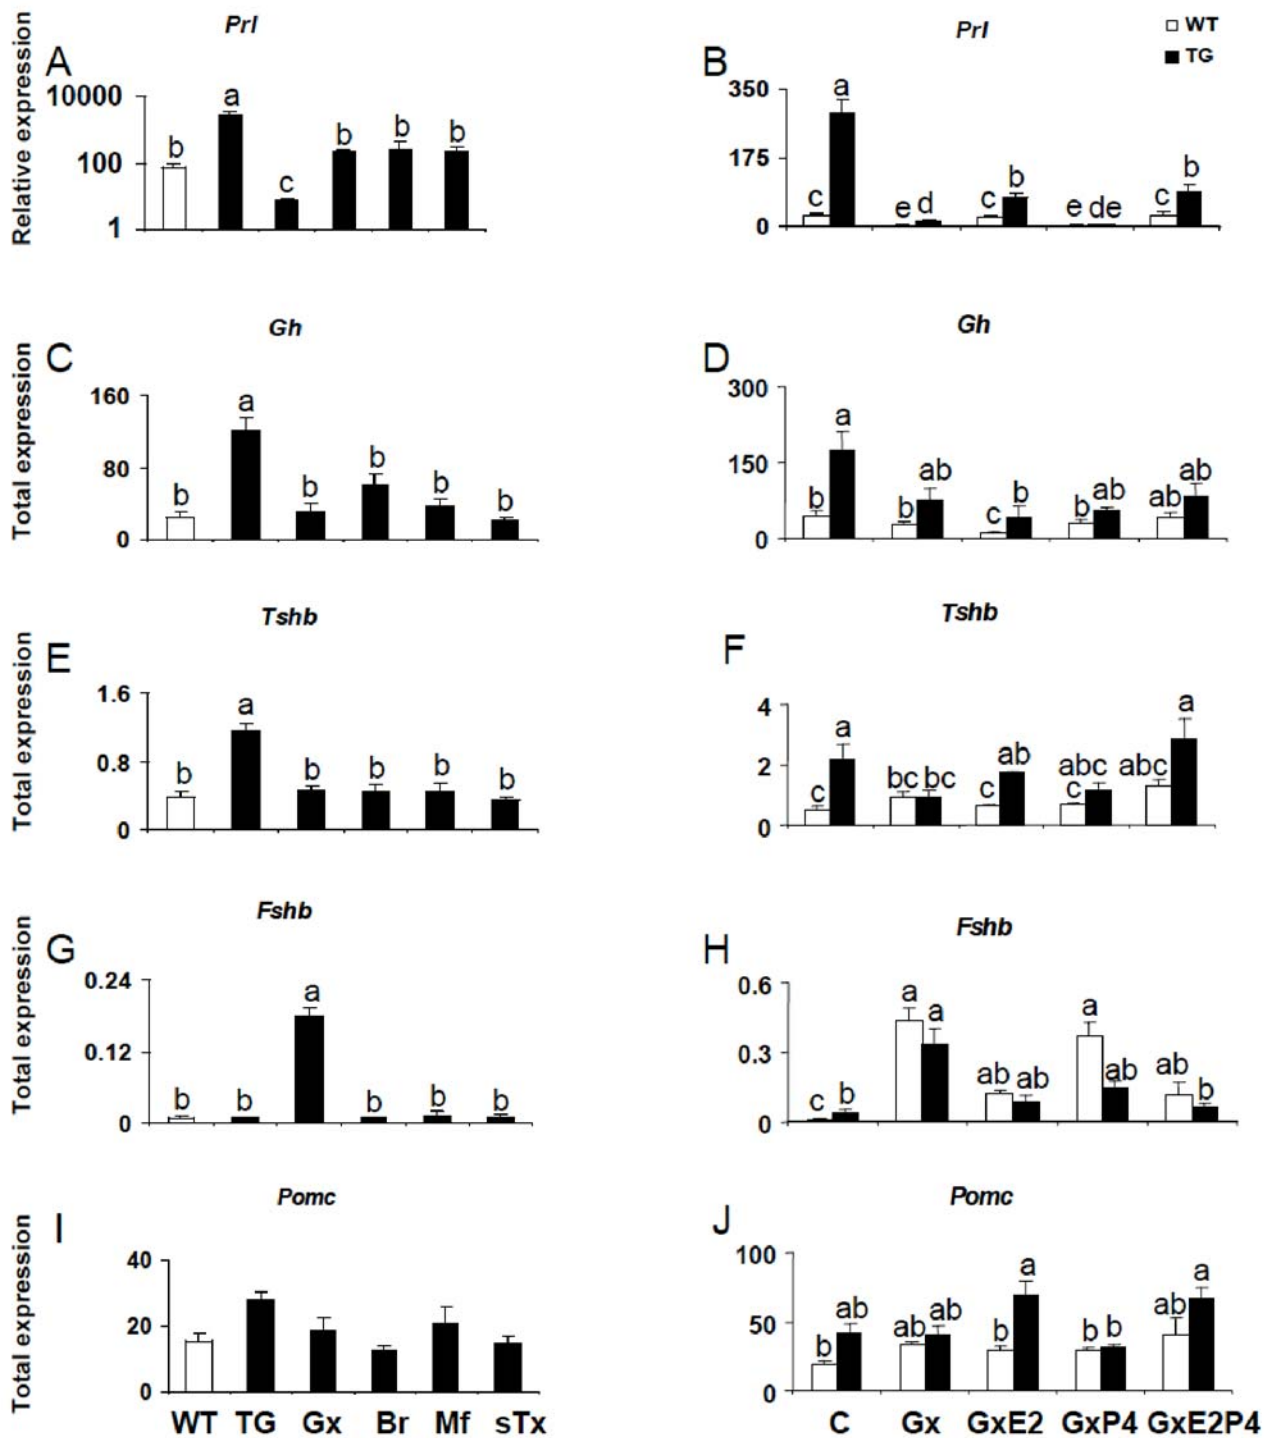

**Supplementary Figure 4** Total pituitary expression (i.e. housekeeping gene-adjusted expression  $\times$  pituitary weight) of PrI (A, B), Gh (C, D), Tshb (E, F), Fshb (G, H), and Pomc (I, J) in the hormone antagonist (left panels) and hormone replacement (right panels) experiments (Table 1 of the main text). The open bars present WT females and filled bars TG females (mean  $\pm$  SEM of 3–5 mice/group). The treatments are indicated below panels I and J (abbreviations as in Table 1 of the main text). Notice the logarithmic scale in (A). Different letters above the bars denote significant difference between such groups ( $P < 0.05$ ).
